# Supplementary material for: Artificial Intelligent Olfactory System for the Diagnosis of Parkinson’s Disease
Source: PubMed Central journal article supplement — ACS Omega. 2022 Jan 26;7(5):4001–10. doi: 10.1021/acsomega.1c05060 (PMC8829950; doi:10.1021/acsomega.1c05060), 2022-01-26
Supplement: ao1c05060_si_001.pdf [file ao1c05060_si_001.pdf]

## **Supplementary Information**

### **Artificial intelligent olfactory system for the diagnosis of Parkinson's disease**

Wei Fu <sup>1</sup>, Linxin Xu <sup>1</sup>, Qiwen Yu <sup>1</sup>, Jiajia Fang <sup>2</sup>, Guohua Zhao <sup>2</sup>, Yi Li <sup>1</sup>, Chenying  
Pan <sup>1</sup>, Hao Dong <sup>3</sup>, Di Wang <sup>3</sup>, Haiyan Ren <sup>4</sup>, Yi Guo <sup>4</sup>, Qingjun Liu <sup>1</sup>, Jun Liu <sup>1,\*</sup>,  
Xing Chen <sup>1,\*</sup>

<sup>1</sup> Department of Biomedical Engineering, Key Laboratory of Biomedical Engineering  
of Ministry of Education of China, Zhejiang University, Hangzhou, Zhejiang, China;

<sup>2</sup> Department of Neurology, the Fourth Affiliated Hospital, Zhejiang University  
School of Medicine; Yiwu City, Zhejiang Province, 322000, P. R. China

<sup>3</sup> Research Center for Intelligent Sensing, Zhejiang Lab, Hangzhou 311100, China

<sup>4</sup>Tianjin University of Traditional Chinese Medicine, Tianjin 301617, China

#### **\*Author for Correspondence**

Xing Chen and Jun Liu

Current Address:

38 Zheda Road, Zhou Yi Qing Building Room 501,

Hangzhou, Zhejiang, China; 310027;

Email: [cnxingchen@zju.edu.cn](mailto:cnxingchen@zju.edu.cn),

[liujun@zju.edu.cn](mailto:liujun@zju.edu.cn)

## **Table of Contents**

**Figure S1.** Physical image of SAW sensor. (S3)

**Figure S2.** SAW sensor vibration frequency spectrum. (S4)

**Table S1.** Retention time of four standard biomarkers by AIO system. (S5)

**Table S2.** The results of non-parametric test for the four biomarkers. (S6)

**Reference** (S7)

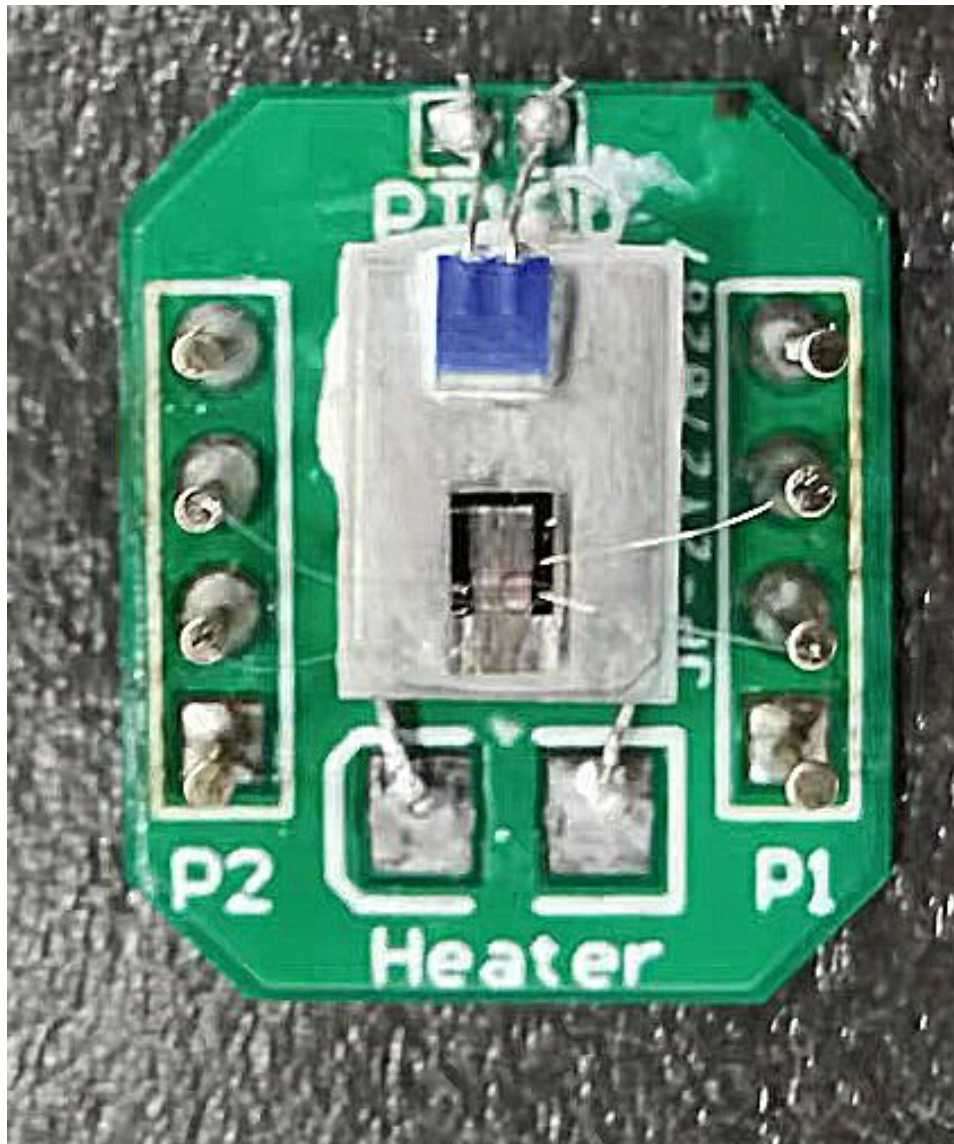

**Figure S1.** Physical image of SAW sensor.

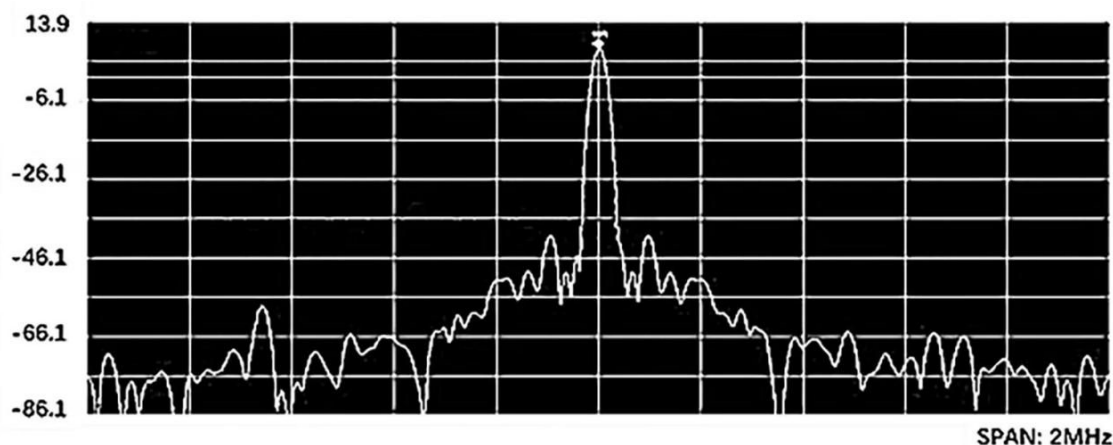

**Figure S2.** SAW sensor's starting frequency spectrum measured by the spectrum analyzer. The center frequency of the sensor is 500.647 MHz. In the case of no load on the sensor surface, the frequency amplitude of the vibration is 7.35 dB, which is consistent with the design parameters. And the frequency band is narrower and the energy is more concentrated. Reprinted in part with permission from <sup>1</sup>. Copyright 2017 Japan Society for Analytical Chemistry

**Table S1.** The results of non-parametric test for the four biomarkers

| <b>Putative identification</b> | <b>p-value</b>                 |                                      |
|--------------------------------|--------------------------------|--------------------------------------|
|                                | <b>Mann-Whitney U<br/>test</b> | <b>Kolmogorov-Smirnov Z<br/>test</b> |
| Octanal                        | 0.571                          | 0.033                                |
| Hexyl acetate                  | 0.987                          | 0.044                                |
| Perillic aldehyde              | 0.014                          | 0.114                                |
| Dodecane                       | 0.519                          | 0.996                                |

**Table S2.** By dissolving them in an appropriate solvent, various standard solutions are prepared for creating chemical mixtures of gauze spiked with human sebum. The following table shows the solvents used to create each standard separately, and then formed a mixture of various concentrations for calibration experiments. And the retention time periods were useful to find the standard from the full-data.

| <b>Standard</b>          | <b>CAS</b> | <b>Mass</b> | <b>Solvent</b> | <b>Retention time(s)<br/>(a time period)</b> |
|--------------------------|------------|-------------|----------------|----------------------------------------------|
| <b>Octanal</b>           | 124-13-0   | 128.21      | Ethanol        | 5.59-5.78                                    |
| <b>Hexyl acetate</b>     | 142-92-7   | 144.21      | Methanol       | 5.89-6.04                                    |
| <b>Perillic aldehyde</b> | 2111-75-3  | 150.22      | Ethanol        | 10.39-10.78                                  |
| <b>Dodecane</b>          | 112-40-3   | 170.33      | Ethanol        | 9.52-9.90                                    |

## References

- (1) Zhang F.; Dong H.; Zhang X.; Guo J.; Liu Y.; Zhou C.; Zhang X.; Liu J.; Yan M.; Chen X. A Non-invasive Monitoring of Propofol Concentration in Blood by a Virtual Surface Acoustic Wave Sensor Array. *Anal Sci* **2017**, *33*, 1271-1277.
